# Supplementary material for: Characterization of the Radiation Desiccation Response Regulon of the Radioresistant Bacterium Deinococcus radiodurans by Integrative Genomic Analyses
Source: MDPI journal article supplement (doi:10.3390/cells10102536), 2021-09-25
Supplement: s1 [file s1]

**Table S2:** Primers used for strains and plasmids constructions. Restriction sites are indicated in bold.

| Primers                                                                                                        | Primer sequence                                                  | Amplified fragment                                                                                                    |
|----------------------------------------------------------------------------------------------------------------|------------------------------------------------------------------|-----------------------------------------------------------------------------------------------------------------------|
| Primers for cloning <i>ddrO</i> for complementation                                                            |                                                                  |                                                                                                                       |
| NE26                                                                                                           | TAC <b>GGATCC</b> GCGCTCACAATTAAGCTTG                            | Multicloning sites from p13841                                                                                        |
| NE27                                                                                                           | TCAC <b>AGATCT</b> GCCGTTTCGCGAACTCGAGTG                         |                                                                                                                       |
| NE28                                                                                                           | TCAG <b>GGATCC</b> AGCGGCCAATTTCTGGTTTC                          | <i>D. radiodurans ddrO</i> and its promoter                                                                           |
| NE29                                                                                                           | AT <b>GCGGCCGCG</b> GGAGTTGTGCGGAAATCAG                          |                                                                                                                       |
| HH134                                                                                                          | GGACT <b>TTAA</b> ATTACTACTTGTTCATCGTCATCCTTG                    | <i>ddrO</i> -FLAG and its promoter                                                                                    |
| HH202                                                                                                          | GCCTGAGTCCATATGACATTGAAACTGCACGAAC                               |                                                                                                                       |
| Primers for construction of <i>ddrO</i> -v5 <i>Ωkan</i> fragment                                               |                                                                  |                                                                                                                       |
| PS611                                                                                                          | GTGCCTGATTCTGCCCACAAG                                            | <i>ddrO</i> 3' region with 5' region of the v5 sequence (complementary sequence with PS465-NE212 fragment)            |
| NE211                                                                                                          | <u>GGCCCAGCAGCGGGTTCGGGATCGGCTTG</u><br>CCGTTTCAGGATGCGTTTGAGATG |                                                                                                                       |
| PS465                                                                                                          | GCTCTTCGTGGCAGGCACAG                                             | Downstream region of <i>ddrO</i> with 3' region of the v5 sequence (complementary sequence with PS611-NE211 fragment) |
| NE212                                                                                                          | <u>GAACCCGCTGCTGGGCCT</u> TGGACAGCACC<br>TGATTTCGCACAACCTC       |                                                                                                                       |
| <i>ddrO</i> -v5 fragment is produced and amplified by fusion PCR (PS611-NE211 fragment + PS465-NE212 fragment) |                                                                  |                                                                                                                       |
| Kan5                                                                                                           | <b>GGAAGGATCC</b> GCATTCTGCCTCCAGCATCTC                          | <i>kan</i> fragment                                                                                                   |
| Kan3                                                                                                           | GGAAT <b>CTAG</b> AGCAAGCAGCAGATTACG                             |                                                                                                                       |
| PS 465                                                                                                         | GCTCTTCGTGGCAGGCACAG                                             | Downstream region of <i>ddrO</i>                                                                                      |
| NE14                                                                                                           | TAATT <b>CTAG</b> ACTGTGAGGAGGCGTGTGAGG                          |                                                                                                                       |
| Primers for construction of v5-tagged protein                                                                  |                                                                  |                                                                                                                       |
| NE281                                                                                                          | TCATT <b>CTAG</b> AGGCAAGCCGATCCCGAACCC                          | v5 <i>Ωkan</i> fragment                                                                                               |
| NE238                                                                                                          | TCAT <b>CTCG</b> AGGGTCTGACGCTCAGTGGAAC                          |                                                                                                                       |
| NE249                                                                                                          | CCCGGCGTAGACGGCCCCAA                                             | Upstream region of <i>drA0166</i>                                                                                     |
| NE250                                                                                                          | TCAT <b>CTCG</b> AGTCTGCGCCTGCTGAAGCTGA                          |                                                                                                                       |
| NE284                                                                                                          | GGGCCTCAGTGTCTGGATTG                                             | Fragment with 3' <i>drA0166</i> region                                                                                |
| NE285                                                                                                          | TCATT <b>CTAG</b> AGCGCAACTGTTCCAGAATCG                          |                                                                                                                       |
| NE254                                                                                                          | TCAT <b>CTCG</b> AGTCTCCCGGGTGGCCTACAAC                          | Upstream region of <i>dr2173</i>                                                                                      |
| NE255                                                                                                          | AGCTGCACGCCCACTTCTTC                                             |                                                                                                                       |
| NE286                                                                                                          | ACCTCTACGGTTGCGATTTC                                             | Fragment with 3' <i>dr2173</i> region                                                                                 |
| NE287                                                                                                          | TCATT <b>CTAG</b> AGGTACAGTCCCAGTTGTAGG                          |                                                                                                                       |
| NE257                                                                                                          | GGCCCACAATCAGGTCCATC                                             |                                                                                                                       |

|       |                                            |                                       |
|-------|--------------------------------------------|---------------------------------------|
| NE258 | TCAT <b>CTCGAG</b> CATGACCCAGCCCTCCATCC    | Upstream region of <i>dr0614</i>      |
| NE288 | GCTTCGTGCAAGACCAGGAC                       | Fragment with 3' <i>dr0614</i> region |
| NE289 | TCAT <b>TCTAGAG</b> TCTGCCCGCTCGCCGAAG     |                                       |
| NE261 | CGACGCCTTCTTCCTGGTTG                       | Upstream region of <i>dr1297</i>      |
| NE262 | TCAT <b>CTCGAGG</b> AGCTCTGGGCAAATTCAGG    |                                       |
| NE290 | GCGCCATTTCGCACCGATTTC                      | Fragment with 3' <i>dr1297</i> region |
| NE291 | TCAT <b>TCTAGAG</b> TGCTCCTTACGGGGCAGCAG   |                                       |
| NE265 | ACCGGCTTTTCGGGCAGTG                        | Upstream region of <i>dr2410</i>      |
| NE266 | TCAT <b>CTCGAGG</b> AAGACACCGCCGAAGCCTG    |                                       |
| NE369 | AACTGTACCTCGGCGAAGTG                       | Fragment with 3' <i>dr2410</i> region |
| NE293 | TCAT <b>TCTAGAG</b> GCTTCGGCGGTGTCTTCG     |                                       |
| NE269 | CGGTAAAGGCGAGCACGAAC                       | Upstream region of <i>dr0561</i>      |
| NE270 | TCAT <b>CTCGAGG</b> CCGTGGGTGAGATTAAGGG    |                                       |
| NE294 | CGGTCAAAGCGGCGAGTTTC                       | Fragment with 3' <i>dr0561</i> region |
| NE295 | TCAT <b>TCTAGAC</b> TTGATATTGCCCTTAATCTCAC |                                       |
| NE273 | CGTTCGACTACGGCCTCTAC                       | Upstream region of <i>ddrF</i>        |
| NE274 | TCAT <b>CTCGAGC</b> TTCCAGCGCCAACTTATCC    |                                       |
| NE296 | TTACGTACTCACGCGATCAG                       | Fragment with 3' <i>ddrF</i> region   |
| NE297 | TCAT <b>TCTAGAA</b> CTGAGGTGCAAGTTTGACAAC  |                                       |
| SI276 | GCGCAACAGTTCAGTGTAAG                       | Upstream region of <i>recG</i>        |
| NE303 | TCAT <b>CTCGAGT</b> TTGCCGCTAGGACCGCTGG    |                                       |
| NE304 | CGCTGCCGAGAAGGATTACG                       | Fragment with 3' <i>recG</i> region   |
| NE305 | TCAT <b>TCTAGAA</b> ATCACTTCGCGGTACGCCACG  |                                       |
| NE306 | CAGCTTGAGGCGAGCAAGAC                       | Upstream region of <i>ligA</i>        |
| NE307 | TCAT <b>TCTAGAGC</b> TTTCAGCGGGGGCCGCCTCAG |                                       |
| NE308 | GAGGGTTTGACGCTGCTCTG                       | Fragment with 3' <i>ligA</i> region   |
| NE309 | TCAT <b>CTCGAGT</b> GCTACCCTAGTCTGACAAG    |                                       |
| NE323 | AGCAGCACGTGGTTGTC                          | Upstream region of <i>dr0216</i>      |
| NE324 | TCAT <b>CTCGAGG</b> ATTCTGATGCGCCTCAAGC    |                                       |
| NE325 | ATTGGCGGCATGACTGCTCC                       | Fragment with 3' <i>dr0216</i> region |
| NE326 | TCAT <b>TCTAGAGC</b> CTCTGCGCCCGCCACGTC    |                                       |
| PS865 | GCGT <b>TCTAGAT</b> TCCTCGCTGTAGGTCTTTTCG  | Upstream region of <i>dr0217</i>      |
| PS866 | GAAGGCCGCGAAATGACCAC                       |                                       |
| NE329 | ACAGCGGTTTCTTCGTCCAG                       | Fragment with 3' <i>dr0217</i> region |
| NE330 | TCAT <b>CTCGAGG</b> CTCGCCTGAGCGATGAAAC    |                                       |
| NE406 | CACTTTCGGTGGTGGGTTCC                       | Upstream region of <i>dr2255</i>      |
| NE407 | TCAT <b>TCTAGAC</b> GCCTCGCGCTCCCAGGCCAC   |                                       |
| NE408 | TTGCCAGGCGTTGCGAAAGC                       | Fragment with 3' <i>dr2255</i> region |
| NE409 | TCAT <b>CTCGAGT</b> CGTCGTTACCCGGAGCAC     |                                       |
| NE340 | CGAGGCCCTGTTTCTTGAGC                       | Upstream region of <i>drC0017</i>     |
| NE341 | TCAT <b>CTCGAGG</b> GTGGACGCATGACACAGAC    |                                       |

|       |                                                        |                                              |
|-------|--------------------------------------------------------|----------------------------------------------|
|       |                                                        |                                              |
| NE342 | TCATCCGCCAGCAGTACGAG                                   | Fragment with 3' <i>drC0017</i> region       |
| NE343 | TCATT <b>CTAGAT</b> GCGTCCACCTCGACCTCCAG               |                                              |
| NE346 | ACGGCGAAAGCTCAGTTGCG                                   | Upstream region of <i>drC0021</i>            |
| NE347 | TCAT <b>CTCGAGT</b> CAGTCCCTCACTCCAGTTC                |                                              |
| NE348 | TTGGAACCGGGAGTGGGAAC                                   | Fragment with 3' <i>drC0021</i> region       |
| NE349 | TCATT <b>CTAGACT</b> CCTCTCTGTTCTGCCGGAGCC             |                                              |
| NE350 | AGGCCGTCATAGAGCGTCTG                                   | Upstream region of <i>dr1262 (rsR)</i>       |
| NE351 | TCATT <b>CTAGAA</b> ACCTCGCCCCGCGCAAAAG                |                                              |
| NE352 | TGCCGTGACTGTCGGTGATG                                   | Fragment with 3' <i>dr1262 (rsR)</i> region  |
| NE353 | TCAT <b>CTCGAGG</b> CCACGCACCATCTCTAACG                |                                              |
| NE354 | GCCTGGCGATGAAGTACAGC                                   | Upstream region of <i>dr0659 (frnE)</i>      |
| NE355 | TCATT <b>CTAGAGT</b> TGTTAGGGCGCTGGGGCACC              |                                              |
| NE356 | TCAAAGTGCCCGTGCGTCAG                                   | Fragment with 3' <i>dr0659(frnE)</i> region  |
| NE357 | TCAT <b>CTCGAGC</b> GAGGCTGCTCTGGCGAAAG                |                                              |
| NE358 | CCGACCAGATCGCCTTTCAG                                   | Upstream region of <i>drA0151 (hutU)</i>     |
| NE359 | TCATT <b>CTAGAC</b> GCGTGATCCTTGATGCCCAG               |                                              |
| NE360 | TTGTCGTAGGCGCTCTGACC                                   | Fragment with 3' <i>drA0151(hutU)</i> region |
| NE368 | TCAT <b>CTCGAGG</b> TCTGGGCATCAAGGATCAC                |                                              |
| NE364 | GAAACTCGGCCTTGATTTCC                                   | Upstream region of <i>dr1482</i>             |
| NE365 | TCAT <b>CTCGAGG</b> ACGCCCTGAAGGGTAATGG                |                                              |
| NE366 | TCGTCATGGGCAAGCACTCG                                   | Fragment with 3' <i>dr1482</i> region        |
| NE367 | TCATT <b>CTAGAGG</b> GCGTCATCTGCGTGATCG                |                                              |
| NE388 | CACCATCAAGCCCGGTGAAG                                   | Upstream region of <i>dr0685</i>             |
| NE389 | GAGGT <b>CTAGAGT</b> TACCTTGACCTGGTAG<br>GTCACGGTGATGG |                                              |
| NE390 | CTCGTTGACCGCTTCGAGTG                                   | Fragment with 3' <i>dr0685</i> region        |
| NE391 | TCAT <b>CTCGAGC</b> CTACCAGGTCAAGGTGAAC                |                                              |
| NE394 | ATCAACGGCCCGAGTAAGTG                                   | Upstream region of <i>dr2174</i>             |
| NE395 | TCGGT <b>CTAGACT</b> TGCCCACGATGTTGATAATC              |                                              |
| NE396 | CGTTATTTCTTGGGCTTGGG                                   | Fragment with 3' <i>dr2174</i> region        |
| NE397 | TCAT <b>CTCGAGG</b> ACTTAATCCGAGCGGAGTG                |                                              |
| EB154 | AAATT <b>CTAGAC</b> CCCAGCGGCGGCAGGTTGC                | Upstream region of <i>ddrR</i>               |
| EB155 | TACGCTGAGTCCATCAGGAG                                   |                                              |
| EB156 | GGA <b>ACTCGAG</b> GCGTGCCTTCTTTGCAAGTC                | Fragment with 3' <i>ddrR</i> region          |
| EB157 | CCGTGTCGGGGTCGCCAGAG                                   |                                              |
| EB158 | AAATT <b>CTAGAA</b> ACCACGCTGTCACGCCCCC                | Upstream region of <i>mutL</i>               |
| EB159 | CGTCTATCAGGAGCTGTACC                                   |                                              |
| EB160 | GGA <b>ACTCGAG</b> ATGTGGGTGGCTTGAGTGCG                | Fragment with 3' <i>mutL</i> region          |
| EB161 | TCACAGCCGGTCAGTGTAAG                                   |                                              |
| EB162 | AAATT <b>CTAGAGT</b> GAGCTTTCTCTGTGCTGG                | Upstream region of <i>irrI</i>               |
| EB163 | CCTCAACACCGTGAAGTATC                                   |                                              |
| EB164 | GGA <b>ACTCGAGC</b> CTCCACGCCTGCCAGGTC                 |                                              |

|        |                                               |                                       |
|--------|-----------------------------------------------|---------------------------------------|
| EB165  | TGTACGCCGAAATCGAGAAG                          | Fragment with 3' <i>irrI</i> region   |
| CB138  | TGGTGGATAAGGCGGGCAAC                          | Upstream region of <i>dr1571</i>      |
| CB139  | ACGTT <b>CTAG</b> AGCGCTTGATCCAGGTCAGCGCGA TG |                                       |
| CB140  | TCAT <b>CTCGAG</b> GAGGTCCTGAGGACGCCTAG       | Fragment with 3' <i>dr1571</i> region |
| CB141  | ATCGACACGGCGAAGTGCAG                          | Upstream region of <i>dr1572</i>      |
| CB142  | TATTCGCCGCTGCTCTACGC                          |                                       |
| CB143  | ACGTT <b>CTAG</b> AGCGCACCCAGCGGGTGACAGCTCC   | Fragment with 3' <i>dr1572</i> region |
| CB144  | TCAT <b>CTCGAG</b> CGCTGAGGGGTGGCTCACTG       |                                       |
| CB145  | GAATGTCGAGGTCGAGAAAG                          | Upstream region of <i>ddrN</i>        |
| ddrN11 | ATT <b>CTAG</b> AGCAGCGCCCTGTGAGGAGCG         |                                       |
| ddrN5  | AGCTTGAAGCGCCGTCTGAG                          | Fragment with 3' <i>ddrN</i> region   |
| ddrN12 | AAT <b>CTCGAG</b> GCTGACGGGACGCTGCTGAC        |                                       |
| ddrN4  | ACATTGAGCGCCTCACCGTC                          | Upstream region of <i>dr0001</i>      |
| CB146  | TGGCTATCCGCGACTTTCCG                          |                                       |
| CB147  | ACGTT <b>CTAG</b> AAACGCGCAGCGTGACCATGACC     | Fragment with 3' <i>dr0001</i> region |
| CB148  | TCAT <b>CTCGAG</b> TAAGGGGCCTTCTGAGGCCGTT     |                                       |
| CB149  | TAGCGGTAGAGCGGGATGTC                          |                                       |
