# Supplementary material for: Characterization of the Radiation Desiccation Response Regulon of the Radioresistant Bacterium Deinococcus radiodurans by Integrative Genomic Analyses
Source: MDPI journal article supplement (doi:10.3390/cells10102536), 2021-09-25
Supplement: s1 [file s1]

**Table S6. Number of unique and common up- and downregulated genes in W37 and D37, respectively during the time course.**

For each time lapse, a 2-fold change expression threshold for the ratio experiments was applied together with a *p-Value* <0.01.

|                                    | <b>1 h-4 h</b> | <b>1 h-6 h</b> | <b>1 h-8 h</b> | <b>1 h-16 h</b> | <b>1 h-24 h</b> |
|------------------------------------|----------------|----------------|----------------|-----------------|-----------------|
| <b>Total in W37</b>                | 350            | 679            | 993            | 1303            | 1501            |
| <b>Up-regulated in W37</b>         | 204            | 332            | 474            | 620             | 732             |
| <b>Down-regulated in W37</b>       | 146            | 347            | 519            | 683             | 769             |
| <b>Total in D37</b>                | 358            | 1011           | 1177           | 1539            | 1536            |
| <b>Up-regulated in D37</b>         | 253            | 576            | 650            | 818             | 788             |
| <b>Down-regulated in D37</b>       | 105            | 435            | 527            | 721             | 748             |
| <b>Common genes in W37 and D37</b> | 159            | 501            | 660            | 912             | 1125            |
| <b>Up-regulated in W37</b>         | 106            | 276            | 339            | 455             | 569             |
| <b>Down-regulated in W37</b>       | 53             | 225            | 321            | 457             | 556             |
| <b>Up-regulated in D37</b>         | 109            | 290            | 368            | 436             | 573             |
| <b>Down-regulated in D37</b>       | 50             | 211            | 292            | 476             | 552             |
