# Supplementary material for: Characterization of the Radiation Desiccation Response Regulon of the Radioresistant Bacterium Deinococcus radiodurans by Integrative Genomic Analyses
Source: MDPI journal article supplement (doi:10.3390/cells10102536), 2021-09-25
Supplement: s1 [file s1]

**Table S1. Bacterial strains and plasmids used in this study**

| Strains                      | Description                                                                           | Source or reference |
|------------------------------|---------------------------------------------------------------------------------------|---------------------|
| <b><i>E. coli</i></b>        |                                                                                       |                     |
| <i>DH5α</i>                  | <i>supE44ΔlacU(Φ 80lacZΔM15)</i><br><i>hsdR17 recA1 endA1 gyrA96 thi-1 relA1</i>      | Laboratory stock    |
| SCS110                       | <i>endA dam dcm supE44 Δ (lac-proAB)</i><br><i>(F' traD36 proAB lacIq ZΔM15)</i>      | Laboratory stock    |
| <b><i>D. radiodurans</i></b> |                                                                                       |                     |
| R1/ GY 9613                  | ATCC 13939                                                                            | Laboratory stock    |
| GY 14125                     | Non homogenotized <i>ΔddrOΩcat</i>                                                    | [20]                |
| GY 15910                     | <i>hflX::HAΩkan</i>                                                                   | [76]                |
| GY 15950                     | <i>ΔirrEΩcat</i>                                                                      | [21]                |
| GY 16977                     | <i>dr0001::v5Ωkan</i>                                                                 | This work           |
| GY 16978                     | <i>ΔirrEΩcat dr0001::v5Ωkan</i>                                                       | This work           |
| GY 16979                     | <i>ddrN::v5Ωkan</i>                                                                   | This work           |
| GY 16980                     | <i>ΔirrEΩcat ddrN::v5Ωkan</i>                                                         | This work           |
| GY 16925                     | <i>recA::HAΩkan ΔddrOΩcat / p11891</i><br><i>(ddrO<sup>+</sup>/repU<sub>TS</sub>)</i> | This work           |
| GY 17357                     | <i>ΔddrOΩcat / p17237</i>                                                             | This work           |
| GY 17370                     | <i>ΔddrOΩcat / p17238</i>                                                             | This work           |
| GY 17375                     | <i>ddrD::HAΩkan ΔddrOΩcat / p17238</i><br><i>(ddrO<sup>+</sup>/repU<sub>TS</sub>)</i> | This work           |
| GY 17381                     | <i>pprA::HAΩkan ΔddrOΩcat / p17238</i><br><i>(ddrO<sup>+</sup>/repU<sub>TS</sub>)</i> | This work           |
| GY 17393                     | <i>ΔddrOΩcat / p17245 (ddrO-FLAG/repU<sub>TS</sub>)</i>                               | This work           |
| GY 17960                     | <i>ΔirrEΩcat dr0216::v5Ωkan</i>                                                       | This work           |
| GY 17962                     | <i>ΔirrEΩcat dr0217::v5Ωkan</i>                                                       | This work           |
| GY 17964                     | <i>ΔirrEΩcat dr2255::v5Ωkan</i>                                                       | This work           |
| GY 17966                     | <i>ΔirrEΩcat drC0017::v5Ωkan</i>                                                      | This work           |
| GY 17968                     | <i>ΔirrEΩcat drC0023::v5Ωkan</i>                                                      | This work           |
| GY 17988                     | <i>drC0017::v5Ωkan</i>                                                                | This work           |
| GY 17994                     | <i>dr0217::v5Ωkan</i>                                                                 | This work           |
| GY 17996                     | <i>dr2255::v5Ωkan</i>                                                                 | This work           |
| GY 18218                     | <i>ddrO::v5Ωkan</i>                                                                   | This work           |
| GY 18303                     | <i>drA0166::v5Ωkan</i>                                                                | This work           |
| GY 18305                     | <i>dr2173::v5Ωkan</i>                                                                 | This work           |
| GY 18307                     | <i>dr0614::v5Ωkan</i>                                                                 | This work           |
| GY 18310                     | <i>dr1297::v5Ωkan</i>                                                                 | This work           |
| GY 18311                     | <i>dr2410::v5Ωkan</i>                                                                 | This work           |
| GY 18313                     | <i>dr0561::v5Ωkan</i>                                                                 | This work           |

|          |                                  |           |
|----------|----------------------------------|-----------|
| GY 18317 | <i>ddrF::v5Ωkan</i>              | This work |
| GY 18323 | <i>ΔirrEΩcat drA0166::v5Ωkan</i> | This work |
| GY 18325 | <i>ΔirrEΩcat dr2173::v5Ωkan</i>  | This work |
| GY 18327 | <i>ΔirrEΩcat dr0614::v5Ωkan</i>  | This work |
| GY 18330 | <i>ΔirrEΩcat dr1297::v5Ωkan</i>  | This work |
| GY 18331 | <i>ΔirrEΩcat dr2410::v5Ωkan</i>  | This work |
| GY 18333 | <i>ΔirrEΩcat dr0561::v5Ωkan</i>  | This work |
| GY 18337 | <i>ΔirrEΩcat ddrF::v5Ωkan</i>    | This work |
| GY 18341 | <i>recG::v5Ωkan</i>              | This work |
| GY 18343 | <i>ligA(dr2069)::v5Ωkan</i>      | This work |
| GY 18345 | <i>ΔirrEΩcat recG::v5Ωkan</i>    | This work |
| GY 18347 | <i>ΔirrEΩcat ligA::v5Ωkan</i>    | This work |
| GY 18364 | <i>ddrR::v5Ωkan</i>              | This work |
| GY 18366 | <i>ΔirrEΩcat ddrR::v5Ωkan</i>    | This work |
| GY 18368 | <i>mutL::v5Ωkan</i>              | This work |
| GY 18370 | <i>ΔirrEΩcat mutL::v5Ωkan</i>    | This work |
| GY 18372 | <i>irrI::v5Ωkan</i>              | This work |
| GY 18374 | <i>ΔirrEΩcat irrI::v5Ωkan</i>    | This work |
| GY 18376 | <i>dr1571::v5Ωkan</i>            | This work |
| GY 18378 | <i>ΔirrEΩcat dr1571::v5Ωkan</i>  | This work |
| GY 18380 | <i>dr1572::v5Ωkan</i>            | This work |
| GY 18382 | <i>ΔirrEΩcat dr1572::v5Ωkan</i>  | This work |
| GY 18384 | <i>frnE(dr0659)::v5Ωkan</i>      | This work |
| GY 18386 | <i>ΔirrEΩcat frnE::v5Ωkan</i>    | This work |
| GY 18388 | <i>rsr(dr1262)::v5Ωkan</i>       | This work |
| GY 18392 | <i>dr1482::v5Ωkan</i>            | This work |
| GY 18394 | <i>ΔirrEΩcat dr1482::v5Ωkan</i>  | This work |
| GY 18505 | <i>dr0216::v5Ωkan</i>            | This work |
| GY 18511 | <i>hutU::v5Ωkan</i>              | This work |
| GY 18514 | <i>ΔirrEΩcat hutU::v5Ωkan</i>    | This work |
| GY 18545 | <i>dr0685::v5Ωkan</i>            | This work |
| GY 18547 | <i>ΔirrEΩcat dr0685::v5Ωkan</i>  | This work |
| GY 18549 | <i>dr217-::v5Ωkan</i>            | This work |
| GY 18551 | <i>ΔirrEΩcat dr2174::v5Ωkan</i>  | This work |
| GY 18557 | <i>ΔirrEΩcat hflX::HAΩkan</i>    | This work |

| <b>Plasmids</b> | <b>Description</b>                                                        | <b>Source or reference</b> |
|-----------------|---------------------------------------------------------------------------|----------------------------|
| pGTC101         | Source of chloramphenicol cassette in <i>D. radiodurans</i>               | Laboratory stock           |
| p11806          | Source of kanamycin cassette in <i>D. radiodurans</i>                     | Laboratory stock           |
| p11554          | Shuttle vector <i>E. coli</i> / <i>D. radiodurans</i> , Spec <sup>R</sup> | Laboratory stock           |
| p12625          | Source of hygromycin cassette in <i>D. radiodurans</i>                    | Laboratory stock           |
| p12723          | Source of FLAG cassette in <i>D. radiodurans</i>                          | Laboratory stock           |
| p12764          | Source of HA cassette in <i>D. radiodurans</i>                            | Laboratory stock           |

|        |                                                                                                                                             |           |
|--------|---------------------------------------------------------------------------------------------------------------------------------------------|-----------|
| p11830 | Vector thermosensitive for replication in <i>D. radiodurans</i> Spec <sup>R</sup> , <i>prepU</i> <sub>TS</sub>                              | [53]      |
| p11891 | p13841: <i>prepU</i> <sub>TS</sub> :: <i>ddrO</i>                                                                                           | [20]      |
| p13841 | Vector thermosensitive for replication in <i>D. radiodurans</i> Spec <sup>R</sup> , <i>prepU</i> <sub>TS</sub> , P <sub>Spac</sub> -term116 | [53]      |
| p17235 | p11554 + multiple site of clonage of p13841                                                                                                 | This work |
| p17236 | p11830 + multiple site of clonage of p13841                                                                                                 | This work |
| p17237 | p17335 : <i>prepU</i> :: <i>ddrO</i>                                                                                                        | This work |
| p17238 | p17336 : <i>prepU</i> <sub>TS</sub> :: <i>ddrO</i>                                                                                          | This work |
| p17245 | p17236 : <i>prepU</i> <sub>TS</sub> :: <i>ddrO</i> -FLAG                                                                                    | This work |

---
